# Supplementary material for: Extracorporeal Shock Wave Therapy Provides Limited Therapeutic Effects on Carpal Tunnel Syndrome: A Systematic Review and Meta-Analysis
Source: MDPI journal article supplement (doi:10.3390/medicina58050677), 2022-05-19
Supplement: s1 [file s1]

MY NCBI FILTERS

15 results

RESULTS BY YEAR

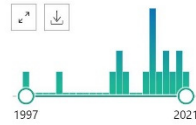

TEXT AVAILABILITY

- ☐ Abstract  
☐ Free full text  
☐ Full text

The following terms were ignored: "", ""

**Carpal Tunnel Syndrome: Diagnosis and Management.**

1  
Wiperman J, Goerl K.  
Cite  
Am Fam Physician. 2016 Dec 15;94(12):993-999.  
PMID: 28075090 Free article Review.

Share  
**Carpal tunnel syndrome**, the most common **entrapment neuropathy** of the upper extremity, is caused by **compression** of the **median** nerve as it travels through the **carpal tunnel** ...If surgical decompression is planned, elec ...

**Conservative treatment in patients with mild to moderate carpal tunnel syndrome: A systematic review.**

2  
Jiménez Del Barrio S, Bueno Gracia E, Hidalgo García C, Estébanez de Miguel E, Tricás Moreno JM,

**Figure S1. PubMed** ((extracorporeal shock wave therapy) OR (shock wave) OR (ESWT)) AND ((carpal tunnel syndrome) OR (Median Neuropathy) OR (Compression Neuropathy) OR (Entrapment Neuropathy)) AND ((splint) OR (conservative treatment)).

**Figure S2. Embase:** ('extracorporeal shock wave therapy' OR 'shock wave' OR 'eswt') AND ('carpal tunnel syndrome' OR 'median neuropathy' OR 'compression neuropathy' OR 'entrapment neuropathy') AND ('splint' OR 'conservative treatment').

Cochrane Reviews ▾ Trials ▾ Clinical Answers ▾ About ▾ Help ▾ About Cochrane ▸

**We noticed your browser language is Traditional Chinese.**  
You can select your preferred language at the top of any page, and you will see translated Cochrane Review sections in this language. Change to **Traditional Chinese**.

Filter your results

Year  
Year first published  
2021 ..... 3  
2020 ..... 4  
2019 ..... 2  
2018 ..... 1  
2017 ..... 2  
Custom Range:  
yyyy to yyyy  
Apply Clear

Date  
Date added to CENTRAL trials database  
The last 3 months ..... 3  
The last 6 months ..... 4

Cochrane Reviews 0 Cochrane Protocols 0 Trials 17 Editorials 0 Special Collections 0 Clinical Answers 0 More ▾

**For COVID-19 related studies, please also see the Cochrane COVID-19 Study Register**

**17 Trials matching ('extracorporeal shock wave therapy' OR 'shock wave' OR 'eswt') AND ('carpal tunnel syndrome' OR 'median neuropathy' OR 'compression neuropathy' OR 'entrapment neuropathy') AND ('splint' OR 'conservative treatment') in Title Abstract Keyword**

Cochrane Central Register of Controlled Trials  
Issue 8 of 12, August 2021

☐ Select all (17) Export selected citation(s)

Order by Relevancy Results per page 25 ▾

1 ☐ **The Effect of ESWT in Carpal Tunnel Syndrome**  
NCT04896398  
<https://clinicaltrials.gov/show/NCT04896398>, 2021 | added to CENTRAL: 30 June 2021 | 2021 Issue 06  
CT.gov

2 ☐ **The effectiveness of extracorporeal shock wave therapy and wrist splint for management of carpal tunnel syndrome**  
IRCT2014083118991N1  
<http://www.who.int/trialsearch/Trial2.aspx?TrialID=IRCT2014083118991N1>, 2014 | added to CENTRAL: 31 March 2019 | 2019 Issue 3

**Figure S3.** Cochrane Library: ('extracorporeal shock wave therapy' OR 'shock wave' OR 'eswt') AND ('carpal tunnel syndrome' OR 'median neuropathy' OR 'compression neuropathy' OR 'entrapment neuropathy') AND ('splint' OR 'conservative treatment').

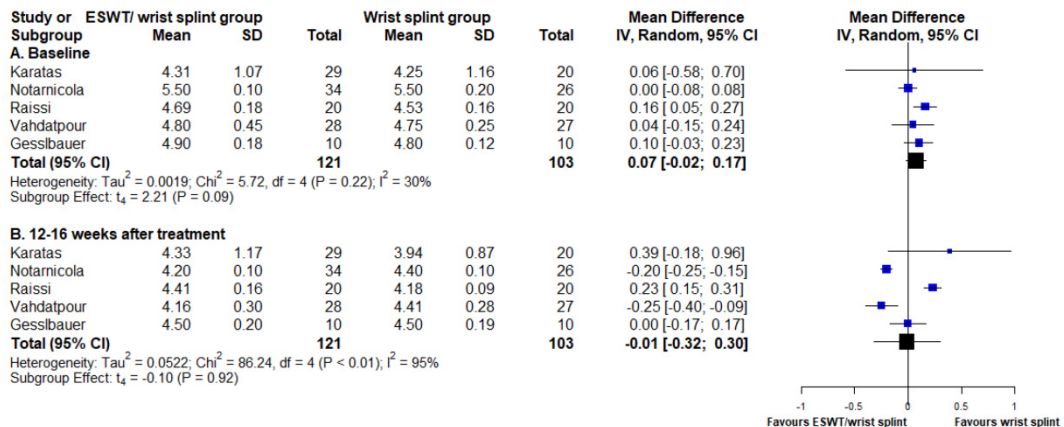

**Figure S4.** Forest plot of mean difference in distal motor latency of median nerve between ESWT/ night wrist splint and night wrist splint alone groups at (A) baseline and (B) 12-16 weeks after intervention.

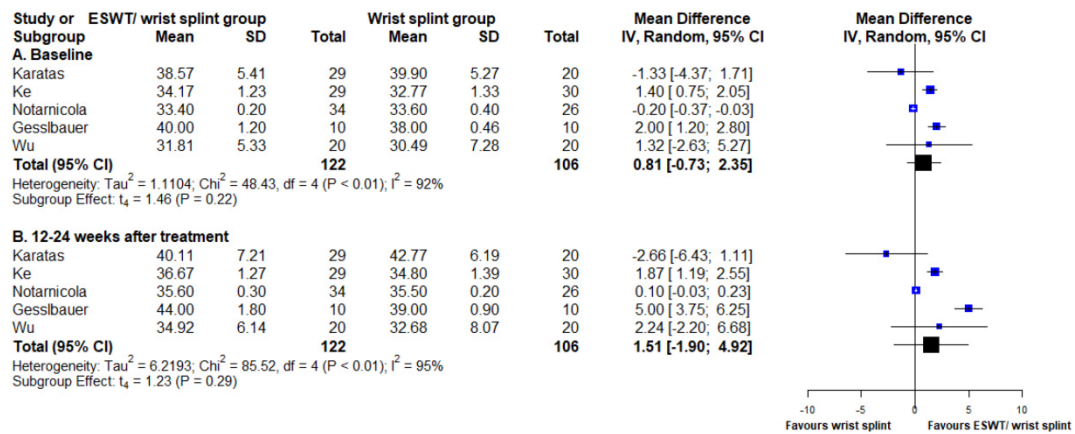

**Figure S5.** Forest plot of mean difference in sensory nerve conduction velocity between ESWT/ night wrist splint and night wrist splint alone groups at (A) baseline and (B) 12-24 weeks after intervention.
