# Supplementary material for: Extracorporeal Shock Wave Therapy Provides Limited Therapeutic Effects on Carpal Tunnel Syndrome: A Systematic Review and Meta-Analysis
Source: MDPI journal article supplement (doi:10.3390/medicina58050677), 2022-05-19
Supplement: s1 [file s1]

**Table S1.** Methodology quality assessments by RoB2 of the included studies

| Domain 1: Risk of bias arising from the randomization process                                              |                                                                                                                                                                                                                                                                                                                                            |                                                  |
|------------------------------------------------------------------------------------------------------------|--------------------------------------------------------------------------------------------------------------------------------------------------------------------------------------------------------------------------------------------------------------------------------------------------------------------------------------------|--------------------------------------------------|
| Signalling questions                                                                                       | Comments                                                                                                                                                                                                                                                                                                                                   | Response options                                 |
| 1.1 Was the allocation sequence random?                                                                    | Gesslbauer [2020] 1.1: <u>Y</u><br>1.2: <u>PY</u>                                                                                                                                                                                                                                                                                          | <u>Y</u> / <u>PY</u> / <u>PN</u> / <u>N</u> / NI |
| 1.2 Was the allocation sequence concealed until participants were enrolled and assigned to interventions?  | Karataş [2019] 1.1: <u>N</u> 1.2: <u>N</u><br><br>Ke [2016] 1.1: <u>Y</u> 1.2: <u>PY</u><br><br>Notarnicola [2015] 1.1: <u>Y</u><br>1.2: NI<br><br>Raissi [2016] 1.1: <u>Y</u> 1.2: <u>PY</u><br><br>Ulucaköy [2019] <u>Y</u> 1.2: <u>PY</u><br><br>Vahdatpour [2016] 1.1: <u>PY</u> 1.2: NI<br><br>Wu [2016] 1.1: <u>Y</u> 1.2: <u>PY</u> | <u>Y</u> / <u>PY</u> / <u>PN</u> / <u>N</u> / NI |
| 1.3 Did baseline differences between intervention groups suggest a problem with the randomization process? | Gesslbauer [2020] 1.3: <u>N</u><br><br>Karataş [2019] 1.3: <u>N</u><br><br>Ke [2016] 1.3: <u>N</u>                                                                                                                                                                                                                                         | <u>Y</u> / <u>PY</u> / <u>PN</u> / <u>N</u> / NI |

|                                                                                                                               |                                                                                                                                                                                                         |                                                                                                |
|-------------------------------------------------------------------------------------------------------------------------------|---------------------------------------------------------------------------------------------------------------------------------------------------------------------------------------------------------|------------------------------------------------------------------------------------------------|
|                                                                                                                               | Notarnicola [2015] 1.3: <a href="#">N</a><br>Raissi [2016] 1.3: <a href="#">N</a><br>Ulucaköy [2019]: <a href="#">N</a><br>Vahdatpour [2016] 1.3: <a href="#">N</a><br>Wu [2016] 1.3: <a href="#">N</a> |                                                                                                |
| <b>Risk-of-bias judgement</b>                                                                                                 | Gesslbauer [2020] Low<br>Karataş [2019] High<br>Ke [2016] Low<br>Notarnicola [2015] some concerns<br>Raissi [2016] Low<br>Ulucaköy [2019] Low<br>Vahdatpour [2016] Low<br>Wu [2016] Low                 | Low / High / Some concerns                                                                     |
| Optional: What is the predicted direction of bias arising from the randomization process?                                     |                                                                                                                                                                                                         | NA / Favours experimental / Favours comparator / Towards null / Away from null / Unpredictable |
| <b>Domain 2: Risk of bias due to deviations from the intended interventions (<i>effect of assignment to intervention</i>)</b> |                                                                                                                                                                                                         |                                                                                                |
| <b>Signalling questions</b>                                                                                                   | <b>Comments</b>                                                                                                                                                                                         | <b>Response options</b>                                                                        |
| <b>2.1. Were participants aware of their assigned intervention during the trial?</b>                                          | Gesslbauer [2020] 2.1: NI 2.2: <a href="#">Y</a>                                                                                                                                                        | <a href="#">Y</a> / <a href="#">PY</a> / <a href="#">PN</a> / <a href="#">N</a> / NI           |

|                                                                                                                                                   |                                                                                                                                                                                                                                                                                                                           |                                                       |
|---------------------------------------------------------------------------------------------------------------------------------------------------|---------------------------------------------------------------------------------------------------------------------------------------------------------------------------------------------------------------------------------------------------------------------------------------------------------------------------|-------------------------------------------------------|
| <p><b>2.2. Were carers and people delivering the interventions aware of participants' assigned intervention during the trial?</b></p>             | <p>Karataş [2019] 2.1: NI<br/>2.2: <b>Y</b><br/>Ke [2016] 2.1: <b>PN</b> 2.2: <b>Y</b><br/>Notarnicola [2015] 2.1:<br/>NI 2.2: <b>Y</b><br/>Raissi [2016] 2.1: NI 2.2:<br/><b>Y</b><br/>Ulucaköy [2019] 2.1: NI<br/>2.2: <b>Y</b><br/>Vahdatpour [2016] 2.1:<br/>NI 2.2: <b>Y</b><br/>Wu [2016] 2.1: NI 2.2: <b>Y</b></p> | <p><b>Y / PY / <u>PN / N</u> / NI</b></p>             |
| <p><b>2.3. If <u>Y/PY/NI</u> to 2.1 or 2.2: Were there deviations from the intended intervention that arose because of the trial context?</b></p> | <p>Gesslbauer [2020] 2.3: <b>N</b><br/>Karataş [2019] 2.3: <b>N</b><br/>Ke [2016] 2.3: <b>N</b><br/>Notarnicola [2015] 2.3:<br/><b>N</b><br/>Raissi [2016] 2.3: <b>N</b><br/>Ulucaköy [2019] 2.3: <b>N</b><br/>Vahdatpour [2016] 2.3:<br/><b>N</b></p>                                                                    | <p>NA / <b>Y / PY</b> / <b><u>PN / N</u></b> / NI</p> |

|                                                                                                                                                                                      |                                                                                                                                                                                                                                                              |                                                       |
|--------------------------------------------------------------------------------------------------------------------------------------------------------------------------------------|--------------------------------------------------------------------------------------------------------------------------------------------------------------------------------------------------------------------------------------------------------------|-------------------------------------------------------|
|                                                                                                                                                                                      | Wu [2016] 2.3: <u>N</u>                                                                                                                                                                                                                                      |                                                       |
| <b>2.4 If <u>Y/PY</u> to 2.3: Were these deviations likely to have affected the outcome?</b>                                                                                         |                                                                                                                                                                                                                                                              | NA / <u>Y</u> / <u>PY</u> / <u>PN</u> / <u>N</u> / NI |
| <b>2.5. If <u>Y/PY/NI</u> to 2.4: Were these deviations from intended intervention balanced between groups?</b>                                                                      |                                                                                                                                                                                                                                                              | NA / <u>Y</u> / <u>PY</u> / <u>PN</u> / <u>N</u> / NI |
| <b>2.6 Was an appropriate analysis used to estimate the effect of assignment to intervention?</b>                                                                                    | Gesslbauer [2020] 2.6: <u>Y</u><br>Karataş [2019] 2.6: <u>Y</u><br>Ke [2016] 2.6: <u>Y</u><br>Notarnicola [2015] 2.6: <u>Y</u><br>Raissi [2016] 2.6: <u>Y</u><br>Ulucaköy [2019] 2.6: <u>Y</u><br>Vahdatpour [2016] 2.6: <u>Y</u><br>Wu [2016] 2.6: <u>Y</u> | <u>Y</u> / <u>PY</u> / <u>PN</u> / <u>N</u> / NI      |
| <b>2.7 If <u>N/PN/NI</u> to 2.6: Was there potential for a substantial impact (on the result) of the failure to analyse participants in the group to which they were randomized?</b> |                                                                                                                                                                                                                                                              | NA / <u>Y</u> / <u>PY</u> / <u>PN</u> / <u>N</u> / NI |
| <b>Risk-of-bias judgement</b>                                                                                                                                                        | Gesslbauer [2020] Low<br>Karataş [2019] Low<br>Ke [2016] Low<br>Notarnicola [2015] Low<br>Raissi [2016] Low<br>Ulucaköy [2019] Low                                                                                                                           | Low / High / Some concerns                            |

|                                                                                                                |                                                                                                                                                                                                                                                               |                                                                                                |
|----------------------------------------------------------------------------------------------------------------|---------------------------------------------------------------------------------------------------------------------------------------------------------------------------------------------------------------------------------------------------------------|------------------------------------------------------------------------------------------------|
|                                                                                                                | Vahdatpour [2016] Low<br>Wu [2016] Low                                                                                                                                                                                                                        |                                                                                                |
| Optional: What is the predicted direction of bias due to deviations from intended interventions?               |                                                                                                                                                                                                                                                               | NA / Favours experimental / Favours comparator / Towards null / Away from null / Unpredictable |
| <b>Domain 3: Missing outcome data</b>                                                                          |                                                                                                                                                                                                                                                               |                                                                                                |
| <b>Signalling questions</b>                                                                                    | <b>Comments</b>                                                                                                                                                                                                                                               | <b>Response options</b>                                                                        |
| <b>3.1 Were data for this outcome available for all, or nearly all, participants randomized?</b>               | Gesslbauer [2020] 3.1: <u>Y</u><br>Karataş [2019] 3.1: <u>PY</u><br>Ke [2016] 3.1: <u>Y</u><br>Notarnicola [2015] 3.1: <u>Y</u><br>Raissi [2016] 3.1: <u>Y</u><br>Ulucaköy [2019] 3.1: <u>Y</u><br>Vahdatpour [2016] 3.1: <u>Y</u><br>Wu [2016] 3.1: <u>Y</u> | <u>Y</u> / <u>PY</u> / <u>PN</u> / <u>N</u> / NI                                               |
| <b>3.2 If <u>N/PN/NI</u> to 3.1: Is there evidence that the result was not biased by missing outcome data?</b> |                                                                                                                                                                                                                                                               | NA / <u>Y</u> / <u>PY</u> / <u>PN</u> / <u>N</u>                                               |
| <b>3.3 If <u>N/PN</u> to 3.2: Could missingness in the outcome depend on its true value?</b>                   |                                                                                                                                                                                                                                                               | NA / <u>Y</u> / <u>PY</u> / <u>PN</u> / <u>N</u> / NI                                          |
| <b>3.4 If <u>Y/PY/NI</u> to 3.3: Is it likely that missingness in the outcome depended on its true value?</b>  |                                                                                                                                                                                                                                                               | NA / <u>Y</u> / <u>PY</u> / <u>PN</u> / <u>N</u> / NI                                          |

|                                                                                |                                                                                                                                                                                                                                                                                                                                      |                                                                                                |
|--------------------------------------------------------------------------------|--------------------------------------------------------------------------------------------------------------------------------------------------------------------------------------------------------------------------------------------------------------------------------------------------------------------------------------|------------------------------------------------------------------------------------------------|
| <b>Risk-of-bias judgement</b>                                                  | Gesslbauer [2020] Low<br>Karataş [2019] Low<br>Ke [2016] Low<br>Notarnicola [2015] Low<br>Raissi [2016] Low<br>Ulucaköy [2019] Low<br>Vahdatpour [2016] Low<br>Wu [2016] Low                                                                                                                                                         | Low / High / Some concerns                                                                     |
| Optional: What is the predicted direction of bias due to missing outcome data? |                                                                                                                                                                                                                                                                                                                                      | NA / Favours experimental / Favours comparator / Towards null / Away from null / Unpredictable |
| <b>Domain 4: Risk of bias in measurement of the outcome</b>                    |                                                                                                                                                                                                                                                                                                                                      |                                                                                                |
| <b>Signalling questions</b>                                                    | <b>Comments</b>                                                                                                                                                                                                                                                                                                                      | <b>Response options</b>                                                                        |
| <b>4.1 Was the method of measuring the outcome inappropriate?</b>              | Gesslbauer [2020] 4.1: <a href="#">N</a><br>Karataş [2019] 4.1: <a href="#">N</a><br>Ke [2016] 4.1: <a href="#">N</a><br>Notarnicola [2015] 4.1: <a href="#">N</a><br>Raissi [2016] 4.1: <a href="#">N</a><br>Ulucaköy [2019] 4.1: <a href="#">N</a><br>Vahdatpour [2016] 4.1: <a href="#">N</a><br>Wu [2016] 4.1: <a href="#">N</a> | <a href="#">Y</a> / <a href="#">PY</a> / <a href="#">PN</a> / <a href="#">N</a> / NI           |

|                                                                                                                                 |                                                                                                                                                                                                                                                                                                                                      |                                                           |
|---------------------------------------------------------------------------------------------------------------------------------|--------------------------------------------------------------------------------------------------------------------------------------------------------------------------------------------------------------------------------------------------------------------------------------------------------------------------------------|-----------------------------------------------------------|
|                                                                                                                                 |                                                                                                                                                                                                                                                                                                                                      |                                                           |
| 4.2 Could measurement or ascertainment of the outcome have differed between intervention groups?                                | Gesslbauer [2020] 4.2: <a href="#">N</a><br>Karataş [2019] 4.2: <a href="#">N</a><br>Ke [2016] 4.2: <a href="#">N</a><br>Notarnicola [2015] 4.2: <a href="#">N</a><br>Raissi [2016] 4.2: <a href="#">N</a><br>Ulucaköy [2019] 4.2: <a href="#">N</a><br>Vahdatpour [2016] 4.2: <a href="#">N</a><br>Wu [2016] 4.2: <a href="#">N</a> | Y / PY / <a href="#">PN</a> / <a href="#">N</a> / NI      |
| 4.3 If <a href="#">N/PN/NI</a> to 4.1 and 4.2: Were outcome assessors aware of the intervention received by study participants? | Gesslbauer [2020] 4.3: <a href="#">N</a><br>Karataş [2019] 4.3: NI<br>Ke [2016] 4.3: <a href="#">N</a><br>Notarnicola [2015] 4.3: NI<br>Raissi [2016] 4.3: <a href="#">N</a><br>Ulucaköy [2019] 4.3: <a href="#">N</a>                                                                                                               | NA / Y / PY / <a href="#">PN</a> / <a href="#">N</a> / NI |

|                                                                                                                                        |                                                                                                                                 |                                  |
|----------------------------------------------------------------------------------------------------------------------------------------|---------------------------------------------------------------------------------------------------------------------------------|----------------------------------|
|                                                                                                                                        | Vahdatpour [2016] 4.3: NI<br>Wu [2016] 4.3: <u>N</u>                                                                            |                                  |
| <b>4.4 If <u>Y/PY/NI</u> to 4.3: Could assessment of the outcome have been influenced by knowledge of intervention received?</b>       | Karataş [2019] 4.4: PY<br>Notarnicola [2015] 4.4: PY<br>Vahdatpour [2016] 4.4: PY                                               | NA / Y / PY / <u>PN / N</u> / NI |
| <b>4.5 If <u>Y/PY/NI</u> to 4.4: Is it likely that assessment of the outcome was influenced by knowledge of intervention received?</b> | Karataş [2019] 4.5: <u>PN</u><br>Notarnicola [2015] 4.5: <u>PN</u><br>Vahdatpour [2016] 4.5: <u>PN</u>                          | NA / Y / PY / <u>PN / N</u> / NI |
| <b>Risk-of-bias judgement</b>                                                                                                          | Gesslbauer [2020] Low<br>Karataş [2019] Some concerns<br>Ke [2016] Low<br>Notarnicola [2015] Some concerns<br>Raissi [2016] Low | Low / High / Some concerns       |



|                                                                                                                                                                                     |                                                                                                                                                                                                                                                              |                                                                                                |
|-------------------------------------------------------------------------------------------------------------------------------------------------------------------------------------|--------------------------------------------------------------------------------------------------------------------------------------------------------------------------------------------------------------------------------------------------------------|------------------------------------------------------------------------------------------------|
|                                                                                                                                                                                     | Ulucaköy [2019] Low<br>Vahdatpour [2016]<br>Some concerns<br>Wu [2016] Low                                                                                                                                                                                   |                                                                                                |
| Optional: What is the predicted direction of bias in measurement of the outcome?                                                                                                    |                                                                                                                                                                                                                                                              | NA / Favours experimental / Favours comparator / Towards null / Away from null / Unpredictable |
| <b>Domain 5: Risk of bias in selection of the reported result</b>                                                                                                                   |                                                                                                                                                                                                                                                              |                                                                                                |
| <b>Signalling questions</b>                                                                                                                                                         | <b>Comments</b>                                                                                                                                                                                                                                              | <b>Response options</b>                                                                        |
| 5.1 Were the data that produced this result analysed in accordance with a pre-specified analysis plan that was finalized before unblinded outcome data were available for analysis? | Gesslbauer [2020] 5.1: <u>Y</u><br>Karataş [2019] 5.1: <u>Y</u><br>Ke [2016] 5.1: <u>Y</u><br>Notarnicola [2015] 5.1: <u>Y</u><br>Raissi [2016] 5.1: <u>Y</u><br>Ulucaköy [2019] 5.1: <u>Y</u><br>Vahdatpour [2016] 5.1: <u>Y</u><br>Wu [2016] 5.1: <u>Y</u> | <u>Y</u> / <u>PY</u> / <u>PN</u> / <u>N</u> / NI                                               |
| Is the numerical result being assessed likely to have been selected, on the basis of the results, from...                                                                           |                                                                                                                                                                                                                                                              |                                                                                                |

|                                                                                                                                  |                                                                                                                                                                                                                                                                                                                                                                         |                                                                                             |
|----------------------------------------------------------------------------------------------------------------------------------|-------------------------------------------------------------------------------------------------------------------------------------------------------------------------------------------------------------------------------------------------------------------------------------------------------------------------------------------------------------------------|---------------------------------------------------------------------------------------------|
| <p><b>5.2. ... multiple eligible outcome measurements (e.g. scales, definitions, time points) within the outcome domain?</b></p> | <p>Gesslbauer [2020] 5.2: <a href="#">N</a></p> <p>Karataş [2019] 5.2: <a href="#">N</a></p> <p>Ke [2016] 5.2: <a href="#">N</a></p> <p>Notarnicola [2015] 5.2: <a href="#">N</a></p> <p>Raissi [2016] 5.2: <a href="#">N</a></p> <p>Ulucaköy [2019] 5.2: <a href="#">N</a></p> <p>Vahdatpour [2016] 5.2: <a href="#">N</a></p> <p>Wu [2016] 5.2: <a href="#">N</a></p> | <p><a href="#">Y</a> / <a href="#">PY</a> / <a href="#">PN</a> / <a href="#">N</a> / NI</p> |
| <p><b>5.3 ... multiple eligible analyses of the data?</b></p>                                                                    | <p>Gesslbauer [2020] 5.3: <a href="#">N</a></p> <p>Karataş [2019] 5.3: <a href="#">N</a></p> <p>Ke [2016] 5.3: <a href="#">N</a></p> <p>Notarnicola [2015] 5.3: <a href="#">N</a></p> <p>Raissi [2016] 5.3: <a href="#">N</a></p> <p>Ulucaköy [2019] 5.3: <a href="#">N</a></p> <p>Vahdatpour [2016] 5.3: <a href="#">N</a></p> <p>Wu [2016] 5.3: <a href="#">N</a></p> | <p><a href="#">Y</a> / <a href="#">PY</a> / <a href="#">PN</a> / <a href="#">N</a> / NI</p> |

|                                                                                            |                                                                                                                                                                                                   |                                                                                                |
|--------------------------------------------------------------------------------------------|---------------------------------------------------------------------------------------------------------------------------------------------------------------------------------------------------|------------------------------------------------------------------------------------------------|
| Risk-of-bias judgement                                                                     | Gesslbauer [2020] Low<br>Karataş [2019] Low<br>Ke [2016] Low<br>Notarnicola [2015] Low<br>Raissi [2016] Low<br>Ulucaköy [2019] Low<br>Vahdatpour [2016] Low<br>Wu [2016] Low                      | Low / High / Some concerns                                                                     |
| Optional: What is the predicted direction of bias due to selection of the reported result? |                                                                                                                                                                                                   | NA / Favours experimental / Favours comparator / Towards null / Away from null / Unpredictable |
| Overall risk of bias                                                                       |                                                                                                                                                                                                   |                                                                                                |
| Risk-of-bias judgement                                                                     | Gesslbauer [2020] Low<br>Karataş [2019] High<br>Ke [2016] Low<br>Notarnicola [2015] Some concerns<br>Raissi [2016] Low<br>Ulucaköy [2019] Low<br>Vahdatpour [2016] Some concerns<br>Wu [2016] Low | Low / High / Some concerns                                                                     |

|                                                                             |  |                                                                                                |
|-----------------------------------------------------------------------------|--|------------------------------------------------------------------------------------------------|
| Optional: What is the overall predicted direction of bias for this outcome? |  | NA / Favours experimental / Favours comparator / Towards null / Away from null / Unpredictable |
|-----------------------------------------------------------------------------|--|------------------------------------------------------------------------------------------------|

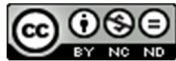

This work is licensed under a [Creative Commons Attribution-NonCommercial-NoDerivatives 4.0 International License](https://creativecommons.org/licenses/by-nc-nd/4.0/).
